# Supplementary material
Source: PubMed Central journal article supplement (PMC2704902)

**Supplemental TABLE I.** Primers for PCR amplification of TcOGNT RNA, DNA and mutagenesis

| <u>Purpose</u>                    | <u>Primer</u> | <u>Species</u>       | <u>Sequence</u>                                    |
|-----------------------------------|---------------|----------------------|----------------------------------------------------|
| <b>Expression</b>                 |               |                      |                                                    |
| full-length TcOGNT2 <sup>1</sup>  | E5S1          | <i>L. tarentolae</i> | 5' - <u>acagatct</u> ccaccatggataaaaagaagc         |
| TcOGNT2cat <sup>2</sup>           | E5S2          | <i>L. tarentolae</i> | 5' -gaggcgccgggtcccaccatggaattg                    |
| both                              | E5AS1         | <i>L. tarentolae</i> | 5' - <u>gactcgagtt</u> atccaagtgttgcccttttc        |
| full-length TcOGNT1               | LiFullS       | <i>L. tarentolae</i> | 5' - <u>atccatgg</u> agcttgaggaaaccaatttgta        |
| full-length TcOGNT1               | LiCATAS       | <i>L. tarentolae</i> | 5' - <u>atctcgagtc</u> atccgcaccatcgaccg           |
| full-length TcOGNT2 <sup>2</sup>  | E5SATG2       | <i>D. discoideum</i> | 5' - <u>ctggtagc</u> ctgatcaatggataaaaaggaagcttgac |
| full-length TcOGNT2 <sup>2</sup>  | E5AS2         | <i>D. discoideum</i> | 5' - <u>gtagatctt</u> ccaagtgttgccctttca           |
| TcOGNT2cat <sup>1</sup>           | E5U2          | <i>D. discoideum</i> | 5' - <u>gaagatct</u> tagatttgacaggcgtgggtccc       |
| TcOGNT2cat <sup>1</sup>           | E5L1          | <i>D. discoideum</i> | 5' - <u>gtgagctc</u> ttatccaactgttgcccttttcgc      |
| TcOGNT2cat <sup>1</sup>           | E5S3          | <i>E. coli</i>       | 5' - <u>gacatatg</u> agatttgacaggcgtgggtccc        |
| TcOGNT2cat <sup>1</sup>           | E5AS3         | <i>E. coli</i>       | 5' - <u>gtggatcct</u> ccaactgttgcccttttcgc         |
| <b>Mutagenesis and expression</b> |               |                      |                                                    |
| TcOGNT2cat <sup>2</sup>           | TcE5D234Afor  | <i>L. tarentolae</i> | 5' -gtgattgctagccattcaagatttgtgcctgagtgg           |
| TcOGNT2cat <sup>2</sup>           | TcE5D234Arev  | <i>L. tarentolae</i> | 5' -cttgaatggctagcaatcaccatatagtaatcctgg           |
| TcOGNT2cat <sup>2</sup>           | TcE5D234Nfor  | <i>L. tarentolae</i> | 5' -gtgattaatagccattcaagatttgtgcctgagtgg           |
| TcOGNT2cat <sup>2</sup>           | TcE5D234Nrev  | <i>L. tarentolae</i> | 5' -cttgaatggctattaatcaccatatagtaatcctgg           |
| <b>5'-splice site mapping</b>     |               |                      |                                                    |
| <i>TcOGNT2</i> <sup>1</sup>       | TcE5AS415     | <i>T. cruzi</i>      | 5' -gagagcgagtcaacacaatgttct                       |
| <i>TcOGNT1</i>                    | TcE2NAS       | <i>T. cruzi</i>      | 5' -tgaaaacccaaccttcggac                           |
| miniexon primer                   | TcME33        | <i>T. cruzi</i>      | 5' -cgctattattgatacagtttctgtactatattg              |

<sup>1</sup> Haplotype Tc00.1047053511309.70 was cloned.

<sup>2</sup> Haplotype Tc00.1047053511759.30 was cloned.

Restriction enzyme sites for cloning are underlined.

**Supplemental Table II.** *TcOGNT2cat* identification in gel bands

Gel bands in Figure 7E were excised, trypsinized and identified by MALDI-TOF-TOF-MS as described in Experimental Procedures. MS/MS data consist of at least 5 expected b or y ions detected after fragmentation. Peptides detected are mapped in Suppl. Figure 2.

| TcOGNT2 position | MH <sup>+</sup> observed | MH <sup>+</sup> expected | Additional evidence | Bands       |
|------------------|--------------------------|--------------------------|---------------------|-------------|
| 66-87            | 2314.0                   | 2314.3                   | MS/MS               | Top, middle |
| 88-101           | 1698.6                   | 1698.8                   |                     | Top, middle |
| 117-131          | 1712.6                   | 1712.8                   |                     | Top, middle |
| 217-238          | 2645.3                   | 2644.9                   | MS/MS               | Top, middle |
| 279-300          | 2416.8                   | 2417.2                   |                     | Top, middle |
| 301-327          | 3062.3                   | 3062.6                   |                     | Top, middle |
| 306-327          | 2378.9                   | 2379.2                   |                     | Top, middle |
| 350-371          | 2708.9                   | 2709.2                   |                     | Top, middle |
| 432-442          | 1319.6                   | 1319.4                   | MS/MS               | Top, bottom |
| 450-468          | 2412.9                   | 2413.1                   |                     | Top, bottom |

**SUPPLEMENTAL FIG. 1.** Alignment of sequences corresponding to the NRD2- and Gal/GalNAc-like domains of select family GT27 and GT60 sequences. Human (Hs) pp- $\alpha$ GalNAcT2 and murine (Mm) pp- $\alpha$ GalNAcT1 initiate *O*- $\alpha$ GalNAc mucin type glycosylation and belong to CAZy family GT27 (Canteral et al. 2009). Dd- $\alpha$ GlcNAcT2 (DdGnt2) initiates the related *O*- $\alpha$ GlcNAc mucin type glycosylation in *Dictyostelium*, and belongs to family GT60. The three related sequences from *T. cruzi* most closely resemble the GT60 sequence class. Amino acids are colored according to group properties, and shaded (using a distinct color scheme) at positions where this property is conserved in either the pp- $\alpha$ GalNAcT or the pp- $\alpha$ GlcNAcT sequences (West et al. 2004), not including TcOGNTL which is predicted to be catalytically inactive. Positions of sequence identity are bolded, and positions in Mm pp- $\alpha$ GalNAcT1 where amino acid substitutions inactivate the enzyme (Hagen et al. 1999) are marked with an asterisk. Amino acid positions relative to the full-length protein are indicated in parentheses.

|               |       | <b>NRD2 Motif-1</b>                                                                                                                                                                                                                                                                                                                                                                                                                    |  |
|---------------|-------|----------------------------------------------------------------------------------------------------------------------------------------------------------------------------------------------------------------------------------------------------------------------------------------------------------------------------------------------------------------------------------------------------------------------------------------|--|
| Hs-ppGalNAcT2 | (139) | <b>S</b> VVIT---FHNE----- <b>A</b> RSALLRTVVS <b>V</b> LK <b>K</b> SP <b>P</b> HLI--- <b>K</b> EIILV- <b>D</b> DYS(178)                                                                                                                                                                                                                                                                                                                |  |
| Mm-ppGalNAcT1 | (119) | <b>S</b> VVIV---FHNE----- <b>A</b> WSTLLRTV <b>H</b> SVINRS <b>P</b> RHMI--- <b>E</b> EIVLV- <b>D</b> DAS(158)                                                                                                                                                                                                                                                                                                                         |  |
|               |       |                                                                                                                                                                                                                                                                                                                                                                                                                                        |  |
| DdGnt2        | (63)  | <b>T</b> IFV <b>S</b> LAA <b>Y</b> RD <b>V</b> F----- <b>C</b> SDTINYIF <b>N</b> H- <b>A</b> NR <b>P</b> E <b>K</b> IF <b>I</b> G <b>I</b> V <b>D</b> Q <b>G</b> S <b>E</b> F <b>L</b> E <b>E</b> D <b>F</b> (109)                                                                                                                                                                                                                     |  |
| TcOGNT2       | (78)  | <b>T</b> IFV <b>S</b> IA <b>A</b> F <b>R</b> D <b>K</b> E----- <b>C</b> V <b>T</b> L <b>L</b> E <b>S</b> L <b>F</b> T <b>R</b> - <b>A</b> KN <b>F</b> RRV <b>L</b> G <b>I</b> S <b>E</b> ER <b>F</b> EM- <b>D</b> S <b>S</b> C(123)                                                                                                                                                                                                    |  |
| TcOGNT1       | (357) | <b>S</b> L <b>F</b> L <b>N</b> IA <b>S</b> F <b>R</b> D <b>K</b> E----- <b>C</b> W <b>P</b> S <b>I</b> D <b>H</b> M <b>I</b> Q <b>R</b> - <b>S</b> T <b>N</b> M <b>F</b> RV <b>V</b> W <b>G</b> V <b>A</b> Q <b>Q</b> H <b>Y</b> YS- <b>D</b> L <b>P</b> C(402)                                                                                                                                                                        |  |
| TcOGNTL       | (182) | <b>S</b> IFV <b>G</b> IT-- <b>H</b> S <b>O</b> E <b>K</b> V <b>T</b> S <b>S</b> E <b>M</b> E <b>T</b> A <b>C</b> A <b>A</b> T <b>V</b> R <b>N</b> I <b>Y</b> D <b>A</b> - <b>A</b> H <b>W</b> P <b>L</b> G <b>V</b> F <b>T</b> G <b>I</b> V <b>E</b> IT <b>L</b> S <b>K</b> T <b>S</b> P <b>T</b> T(236)                                                                                                                               |  |
|               |       |                                                                                                                                                                                                                                                                                                                                                                                                                                        |  |
|               |       | <b>NRD2 Motif-2</b>                                                                                                                                                                                                                                                                                                                                                                                                                    |  |
| Hs-ppGalNAcT2 | (199) | <b>D</b> RR <b>E</b> GL <b>M</b> RS <b>R</b> VR <b>G</b> A- <b>D</b> AA <b>O</b> A <b>K</b> V <b>L</b> T <b>F</b> L <b>D</b> SH <b>C</b> E <b>C</b> NE <b>H</b> W <b>L</b> E <b>P</b> LL <b>E</b> R <b>V</b> A <b>E</b> D <b>R</b> ----- <b>T</b> R <b>V</b> V <b>S</b> P <b>I</b> I <b>D</b> V <b>I</b> (256)                                                                                                                         |  |
| Mm-ppGalNAcT1 | (184) | <b>E</b> OR <b>S</b> GL <b>I</b> R <b>A</b> R <b>L</b> K <b>G</b> A- <b>A</b> V <b>S</b> R <b>G</b> Q <b>V</b> I <b>T</b> F <b>L</b> D <b>A</b> H <b>C</b> E <b>C</b> T <b>A</b> G <b>W</b> L <b>E</b> P <b>L</b> L <b>A</b> R <b>I</b> K <b>H</b> D <b>R</b> ----- <b>R</b> T <b>V</b> V <b>C</b> P <b>I</b> I <b>D</b> V <b>I</b> (241)                                                                                              |  |
| * *           |       |                                                                                                                                                                                                                                                                                                                                                                                                                                        |  |
| DdGnt2        | (143) | <b>A</b> Q <b>S</b> K <b>G</b> P <b>T</b> L <b>A</b> R <b>Y</b> Y <b>A</b> T <b>T</b> L <b>Y</b> N <b>N</b> E <b>T</b> Y <b>F</b> M <b>Q</b> V <b>D</b> S <b>H</b> L <b>R</b> F <b>I</b> K <b>G</b> W- <b>D</b> S <b>L</b> I <b>I</b> N <b>D</b> L <b>W</b> L <b>T</b> K <b>S</b> Y <b>A</b> P <b>I</b> G <b>E</b> N <b>G</b> I <b>P</b> R <b>T</b> V <b>L</b> T <b>H</b> Y <b>P</b> M <b>A</b> Y(212)                                 |  |
| TcOGNT2       | (208) | <b>D</b> D <b>A</b> R <b>G</b> P <b>T</b> Y <b>G</b> R <b>Y</b> L <b>T</b> S <b>L</b> F <b>Y</b> N <b>N</b> Q <b>D</b> Y <b>M</b> V <b>I</b> D <b>S</b> H <b>S</b> R <b>F</b> V <b>P</b> E <b>W</b> - <b>D</b> I <b>K</b> M <b>I</b> E <b>R</b> A <b>R</b> L <b>M</b> P <b>T</b> ----- <b>W</b> G <b>V</b> M <b>S</b> Y <b>P</b> N <b>G</b> Y(267)                                                                                     |  |
| TcOGNT1       | (448) | <b>F</b> T <b>A</b> L <b>G</b> P <b>A</b> F <b>G</b> R <b>Y</b> M <b>S</b> M <b>L</b> L <b>Y</b> C <b>G</b> E <b>D</b> Y <b>M</b> L <b>V</b> L <b>D</b> S <b>H</b> N <b>R</b> F <b>V</b> Y <b>A</b> W- <b>D</b> A <b>R</b> I <b>I</b> A <b>M</b> Q <b>V</b> A <b>L</b> E <b>H</b> P----- <b>K</b> A <b>V</b> L <b>S</b> H <b>Y</b> P <b>E</b> S <b>Y</b> (508)                                                                         |  |
| TcOGNTL       | (318) | <b>T</b> L <b>L</b> S <b>S</b> A <b>A</b> A <b>Q</b> R <b>Y</b> A <b>T</b> L <b>A</b> L <b>Y</b> R <b>G</b> E <b>T</b> Y <b>V</b> M <b>F</b> V <b>R</b> A <b>G</b> L <b>Q</b> L <b>V</b> Y <b>K</b> W- <b>D</b> V <b>L</b> T <b>R</b> L <b>L</b> W <b>L</b> Q <b>L</b> P <b>S</b> ----- <b>R</b> S <b>A</b> V <b>L</b> S <b>Q</b> P <b>V</b> Q <b>I</b> (378)                                                                          |  |
|               |       |                                                                                                                                                                                                                                                                                                                                                                                                                                        |  |
|               |       | <b>Gal/GalNAc Motif</b>                                                                                                                                                                                                                                                                                                                                                                                                                |  |
| Hs-ppGalNAcT2 | (290) | <b>P</b> I <b>K</b> T <b>P</b> M <b>I</b> A <b>G</b> G- <b>L</b> F <b>V</b> M <b>D</b> K <b>F</b> Y <b>F</b> E <b>E</b> L <b>G</b> K <b>Y</b> D <b>M</b> M <b>D</b> - <b>V</b> W <b>G</b> G <b>E</b> N <b>L</b> E <b>I</b> - <b>S</b> F <b>R</b> V <b>W</b> Q <b>C</b> G <b>G</b> S <b>L</b> E <b>I</b> I <b>P</b> C <b>S</b> R- <b>V</b> G- <b>H</b> V <b>F</b> - <b>R</b> K <b>Q</b> H <b>P</b> Y <b>T</b> F <b>F</b> (369)          |  |
| Mm-ppGalNAcT1 | (285) | <b>P</b> V <b>R</b> T <b>F</b> T <b>M</b> A <b>G</b> G- <b>L</b> F <b>S</b> I <b>D</b> R <b>D</b> Y <b>F</b> Q <b>E</b> I <b>G</b> T <b>Y</b> D <b>A</b> G <b>M</b> D- <b>I</b> W <b>G</b> G <b>E</b> N <b>L</b> E <b>I</b> - <b>S</b> F <b>R</b> I <b>W</b> Q <b>C</b> G <b>G</b> T <b>L</b> E <b>I</b> V <b>T</b> C <b>S</b> H- <b>V</b> G- <b>H</b> V <b>F</b> - <b>R</b> K <b>A</b> T <b>Y</b> T <b>F</b> F(354)                   |  |
| *             |       |                                                                                                                                                                                                                                                                                                                                                                                                                                        |  |
| DdGnt2        | (254) | <b>P</b> A <b>E</b> C <b>F</b> Y <b>I</b> A <b>A</b> G <b>F</b> F <b>T</b> - <b>S</b> G <b>E</b> A <b>I</b> K <b>L</b> V <b>P</b> - <b>F</b> D <b>P</b> H <b>L</b> S <b>N</b> L <b>F</b> E <b>G</b> E <b>E</b> I <b>L</b> Y- <b>S</b> V <b>R</b> M <b>Y</b> - <b>S</b> A <b>G</b> - <b>F</b> R <b>F</b> F <b>A</b> P <b>T</b> L <b>N</b> V <b>C</b> F <b>H</b> Y <b>S</b> R <b>P</b> K <b>S</b> P <b>K</b> F <b>F</b> W(324)           |  |
| TcOGNT2       | (308) | <b>P</b> V <b>L</b> Q <b>G</b> F <b>V</b> A <b>A</b> G <b>Y</b> I <b>F</b> G- <b>D</b> A <b>Q</b> F <b>V</b> K <b>D</b> V <b>P</b> - <b>F</b> D <b>P</b> Y <b>L</b> P <b>F</b> L <b>D</b> G <b>E</b> E <b>I</b> L <b>Y</b> - <b>T</b> V <b>R</b> L <b>W</b> - <b>T</b> S <b>G</b> - <b>W</b> D <b>S</b> Y <b>C</b> P <b>G</b> T <b>A</b> F <b>L</b> F <b>H</b> N <b>Y</b> M <b>R</b> T <b>D</b> A <b>P</b> R <b>F</b> F <b>W</b> (378) |  |
| TcOGNT1       | (575) | <b>P</b> L <b>A</b> Q <b>F</b> W <b>A</b> A <b>G</b> G <b>F</b> L <b>F</b> A- <b>N</b> A <b>S</b> V <b>M</b> R <b>E</b> V <b>P</b> - <b>F</b> D <b>P</b> H <b>L</b> P <b>H</b> L <b>D</b> G <b>E</b> E <b>V</b> M <b>Y</b> - <b>S</b> V <b>R</b> L <b>W</b> - <b>T</b> H <b>G</b> - <b>Y</b> D <b>I</b> F <b>S</b> P <b>K</b> R <b>G</b> I <b>C</b> Y <b>H</b> F <b>Y</b> D <b>R</b> P <b>N</b> E <b>P</b> K <b>L</b> L <b>W</b> (645) |  |
| TcOGNTL       | (627) | <b>Y</b> L <b>Q</b> S <b>S</b> W <b>V</b> T <b>P</b> D <b>F</b> L <b>F</b> T- <b>R</b> A <b>E</b> -21- <b>V</b> P- <b>L</b> D <b>P</b> F <b>L</b> S <b>F</b> L <b>G</b> A <b>D</b> E <b>E</b> A <b>V</b> L <b>L</b> S <b>A</b> R <b>L</b> W- <b>T</b> H <b>G</b> - <b>W</b> D <b>F</b> F <b>S</b> S <b>T</b> E <b>P</b> I <b>A</b> F <b>I</b> V <b>T</b> - <b>K</b> P <b>P</b> A <b>E</b> G <b>D</b> A <b>S</b> (716)                  |  |

**SUPPLEMENTAL FIG. 2.** Annotated nucleotide and amino acid sequences of the two TcOGNT2 haplotypes. Nucleotide and amino acid sequences are numbered beginning with the start codon. 5'-splice acceptor sites for TcOGNT2-1 (violet), primer hybridization sites, N-glycosylation sequons, site of mutagenesis, peptide sequences (green or blue) identified by MS (Suppl. Table II), and key motifs are denoted.

>Tc00.1047053511759.30 (*TcOGNT2-2*)

>Tc00.1047053511309.70 (*TcOGNT2-1*)

-240 aacatgtacatttacctgttggttaaactttgaggatgtggtgaattgactcgtatttcat  
-180 tcatctctttcctatgcttatatatatatatattttgatttctattattgatgaacttgg  
-120 gatccggcgagcggcccagctgaatatttggagaggttttacggaaaagggtgtagttc *5'-splice donor nt*  
-60 gacacacaaaaagcaatcaagtaaagggtgaagtaacaactcatatttacatcagcccatg

1 atggataaaaaggaagccttggacggggccttgaggattcatcgtggggggaggggtacaaaag **E5SATG2**  
**atggataaaaagaagccttggacggagccttgagggttcatcgtggggggaggggtggaaaag** **E5S1**  
1 M D K R K L G R G L R I H R G G R G T K  
K S V G

61 agattttttcgagtgtttttggttttcgtggcatttttttactgctgttttttagattt  
agatgttttcgagtgtttttggtttgcgtggcatttttttactgctgttttttagattt **E5U2, E5S3**  
21 R F F R V F L V F V A F F L L L F F R F  
C C

121 gagaggcgt**ggtcccaccatggaattg**gaagatgcagacggcattcttcagacgataccg **E5S2**  
gacagggcgt**ggtcccaccatggaattg**gaagatgcagacggcattcttcagacggtacct  
41 E R R G P T M E L E D A D G I L Q T I P  
D V

181 gtattttcttcgaaggatcttccggctgcaaataataaccagtggacattgctactatttt  
gtattttcttcgaaggatcttccggctgcaaataataaccagtggacattgctactatttt  
61 V F S S K D L P A A N I P V D I A T I F *tryptic peptides*  
*(MS of 40KD band)*

241 gtatccattgcggccttttcgagacaaggaatgtgtcactacactagagagtctctttacc  
gtatccatcgcggccttttcgagacaaggaatgtgtcactacactagagagtctctttacc  
81 V S I A A F R D K E C V T T L E S L F T *tryptic peptides*  
*(MS-MS of 40KD band)*

301 cgcgcgaagaatcctcggagagtgtatttgggtatcagtgaggagcgatttgaaatggat  
cgcgcgaagaatcctcggagagtgtatttgggtatcagtgaggagcgatttgaaatggat  
101 R A K N P R R V Y L G I S E E R F E M D

361 agcagttgcattgcttcaccggaggtgcttaagaacattggtgtgactcgcctctcgtaaa **E5AS415**  
agcagttgcattgcttcaccggaggtgcttaagaacattggtgtgactcgcctctcgtaaa  
121 S S C I A S P E V L K N I G V T R S R K

421 cttcactggaaggatgttgttccctttgcctacaatcccacagacaagcagaaatatccc  
cttcactggaaggatgttgttccctttgcctacgatcccacagacaagcagaaatatccc  
141 L H W K D V V P F A Y N P T D K Q K Y P  
D

481 aagcacacacctgtgctgcatgcaaaacgcgatgaggatgtcatcacgtgtctactcagt  
aagcacacacctgtgctgcatgcaaaacgcgatgaggatgtcatcacgtgtctactcagt  
161 K H T P V L H A K R D E D V I T C L L S

541 gaaggttcttccgacgcaatgcccgccctgggtgaatctgttttgaacggatgtcaggtc  
gaaggttcttccgacgcaatgcccgccctgggtgaatctgttttgaacggatgtcaggtc  
181 E G S S D A M P G P G E S V L N G C Q V

601 ttgacacgcattggacacccggatgatgcacgaggcccgacttacggtcggttacctaaca  
ttgacacgcattggacacccggatgatgcacgaggcccgacttacggtcggttacctaaca  
201 L T R I G H P D D A R G P T Y G R Y L T

661 agtctcttctacaataaccaggattactatatggtgattgacagccattcaagatttgtg  
agtctcttctacaataaccaggattactatatggtgattgacagccattcaagatttgtg

221 S L F Y N N Q D Y Y M V I D S H S R F V DxD-like motif  
N/A mutagenesis

721 cctgagtgggatataaagatgattgaacgtgacggttattgccacttggggcgtaatg  
cctgaatgggatataaagatgattgaacgtgacggttattgccacttggggcgtaatg

241 P E W D I K M I E R A R L M P T W G V M

781 tcgtactacccgaatgggtacacaccggaggatccagatgaggagatcaacaagacggat  
tcgtactacccgaatgggtacacaccggaggaccagatgaggagatcaacaagacggat

261 S Y Y P N G Y T P E D P D A E I **N K T D** **N-glycosylation sequon**

841 gttatggccatgtgtaaggggttatcttagataatgacattccaaagtggggcgcg  
gttatggccatgtgtaaggggttatcttagacaatgacattccaaagtggggcgcg

281 V M A M C K G V I L D N D I P K L G A R

901 tggattgatataaggaccatcctgttctccaaggctttgtagctgctggatataat  
tggattgatataaggaccatcctgttctccaaggctttgtagctgctggatataat

301 W I D I R D H P V L Q G F V A A G Y I F

961 ggggatgagcagtttgtgaaggatgtcccttttgatccgtatcttccatttttattgat  
gggatgagcagtttgtgaaggatgtcccttttgatccgtatcttccatttttattgat

321 G D A Q F V K D V P F D P Y L P F L F D

1021 ggagaggagattctgtacactgtacgctgtggacaagcgggtgggacagttactgtcct  
ggagaggagattctgtacactgttcgcttgggacgagcgggtgggacagttactgtcct

341 G E E I L Y T V R L W T S G W D S Y C P

1081 ggcacggcatttctttttcataactacatgcaaccgatgagcggaggttttggtccgtc  
ggcacggcatttctttttcataactacatgcaaccgatgagcggaggttttggtccgtc

361 G T A F L F H N Y M R T D A P R F W S V

1141 ttgacaagagatgaggtgaaggttcatcggaatttgaacggcagacctccataaaacgt  
ttgacaagagatgaggtgaaggttaccgggaatttgaacggcagacctccataaaacgt

381 L T R D E V K V H R E F E R Q T S I K R

1201 gcgttgatttaaatgagcgggaatgtcttgaactccaccaaccggttgtagcgaagat  
gcatttgatttaaatgagcgggaatgtcttgaactccaccaaccggttgtagcgaagat

401 A L Y L M R R N V L **N S T** Q P V V T E D **N-glycosylation sequon**

1261 gaggcgatcgattgaaccggcgattggacgtgagatggaacactttggattggggatg  
gaggcgatcgattgaaccggcgattggacgtgagatggaacactttggattggggatg

421 E A H R L N P A I G R E M E H F G L G M **tryptic peptide**  
**S** **(MS of 15KD band)**

1321 ttgacgacgatttccgattactggcgttttggtggaacttagtgatgagtttgtaagaa  
ttgacgacgatttccgattactggcgttttggtggaacttagtgatgagtttgtaagaa

441 L R R I S D Y W R F V E L S D E F V K E

1381 aaagatgatgagaatcgctggaagggtggtgaaggctctgtgaaaaggcaacacttgga  
aaggatgatgagaatcgctggaagggtggtgaaggctctgtgaaaaggcaacacttgga  
gcaaaaaggcaacagttgga **E5AS1, E5AS2**  
E5AS3, E5L1

461 K D D E N R W K G G E G L C E K A T L G  
V

1441 taa  
**taa**  
-

**SUPPLEMENTAL FIG. 3.** Synteny of *OGNT* genes in *T. brucei*, *T. cruzi* and *L. major*. *OGNT1* (green boxes) and *OGNTL* (blue boxes) (**A**) and *OGNT2* (pink boxes) (**B**) genes are shown relative to neighboring predicted coding regions. Shaded gray boxes represent conserved hypothetical protein orthologs; white boxes are hypothetical proteins that are not conserved among these chromosomes; red boxes represent casein kinase 2 (CK2); and yellow boxes are phosphoglycan  $\beta$ 1-3-galactosyltransferase-like protein (PG $\beta$ 1-3GalT) and putative phosphoglycan  $\beta$ 1-2-arabinosyltransferase (PG $\beta$ 1-2AraT). Numbers above each box represent the identifier protein numbers for the corresponding *T. brucei* and *L. major* chromosomes (indicated at the right), and for *T. cruzi* haplotypes Tc00.1047053508741.340/Tc00.1047053508741.360 for *OGNT1/OGNTL* and Tc00.1047053511759.70 for *OGNT2*, respectively.

**SUPPLEMENTAL FIG. 4.** Mapping the 5'-region of the *TcOGNT2* transcript. (**A**) Ethidium bromide-stained agarose gel of the reverse transcription and PCR amplification of total epimastigote RNA using the *TcOGNT2*-specific reverse primer TcE5AS415 and the miniexon primer TcME33 (lane 2). Lane 1: same without reverse transcriptase (from a separate gel). Arrow marks position of the ~500 bp product. (**B**) The amplification product was vector-ligated and transfected into *E. coli*. Ten clones were sequenced, and digested with EcoRI and BamHI to release the insert and analyzed by agarose gel electrophoresis. Ethidium bromide staining revealed minor size heterogeneity of the ~500 bp fragments (arrow), suggesting multiple splice sites. Alignment of the sequences with the 5'-UTR of CL-Brener *TcOGNT2-1* gene revealed splice donor sites at positions -70, -101, -109 relative to the translation start site (see Supplemental Figure 2).

**SUPPLEMENTAL FIG. 5.** Expression of *TcOGNT2* in *Dictyostelium*. A soluble protein fraction (300  $\mu$ g) prepared from sonicated microsomes of *D. discoideum* was assayed for 2 h in the absence or presence of peptide T29. *modB*<sup>-</sup>, DdGnt2-null strain DL118; *modB*<sup>-</sup> cat, transfected with *TcOGNT2*cat-myc(C-terminal). Similar absence of detectable activity (data not shown) occurred with the other constructs tested (Figure 1B), and with tagged *TcOGNT1*, and tagged *TcOGNT1* or *TcOGNTL* coexpressed with *TcOGNT2* (unpublished data). Protein expression was verified in all cases (not shown). Results are representative of five independent experiments.

**SUPPLEMENTAL FIG. 6.** Temperature dependence of *TcOGNT2*-dependent and endogenous enzyme activities. (**A**) Transferase activity was assayed in the presence or absence of peptide acceptor as described in Figure 4A. (**B**) UDP-[<sup>3</sup>H]GlcNAc hydrolysis activity was assayed as described in Fig. 4C. Data are plotted relative to values at 22°C, which are shown in corresponding vertical order in the 22° column. Similar results were obtained in a second trial using *TcOGNT2* from hygromycin-resistant cells.

# Supplemental Figure 3

A

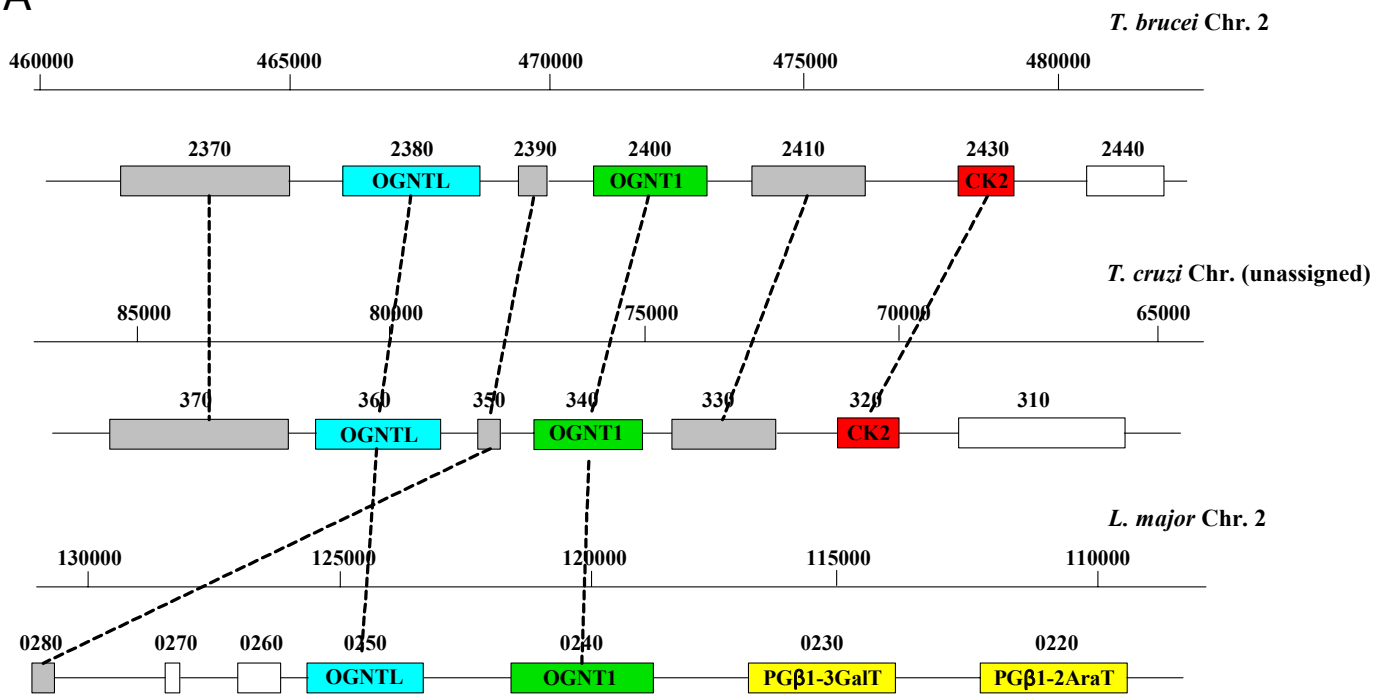

B

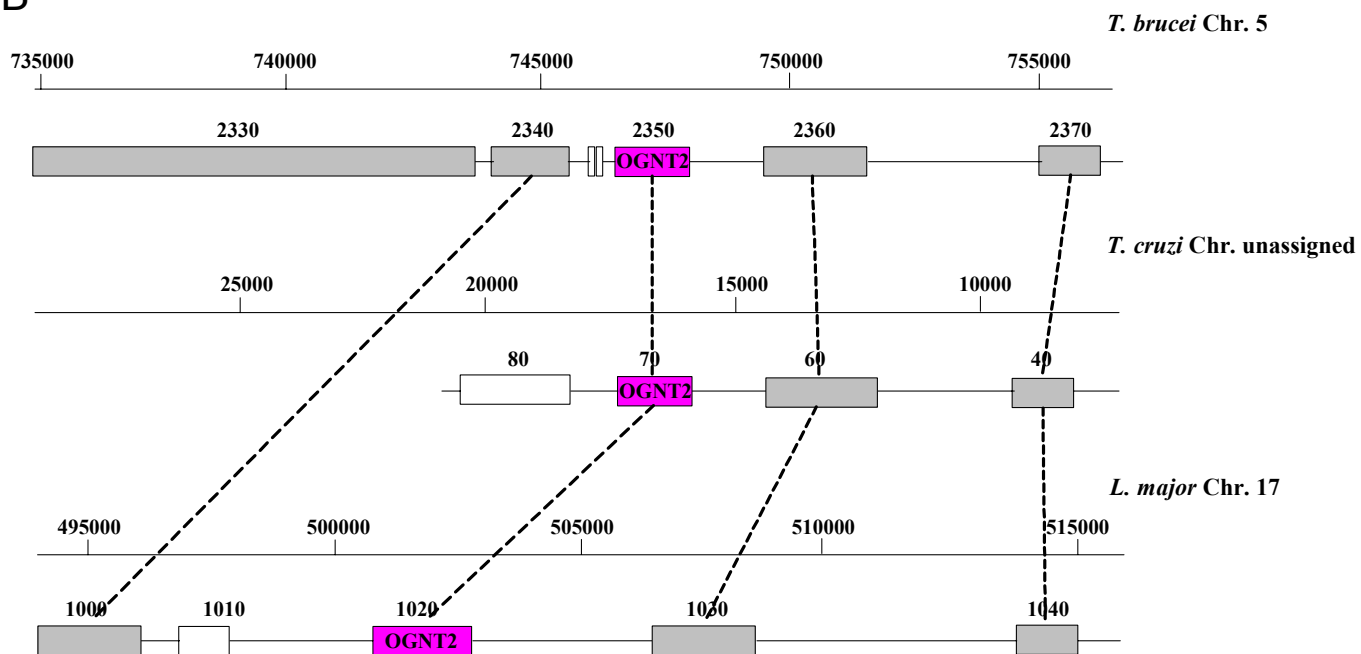

Suppl. Figure 4

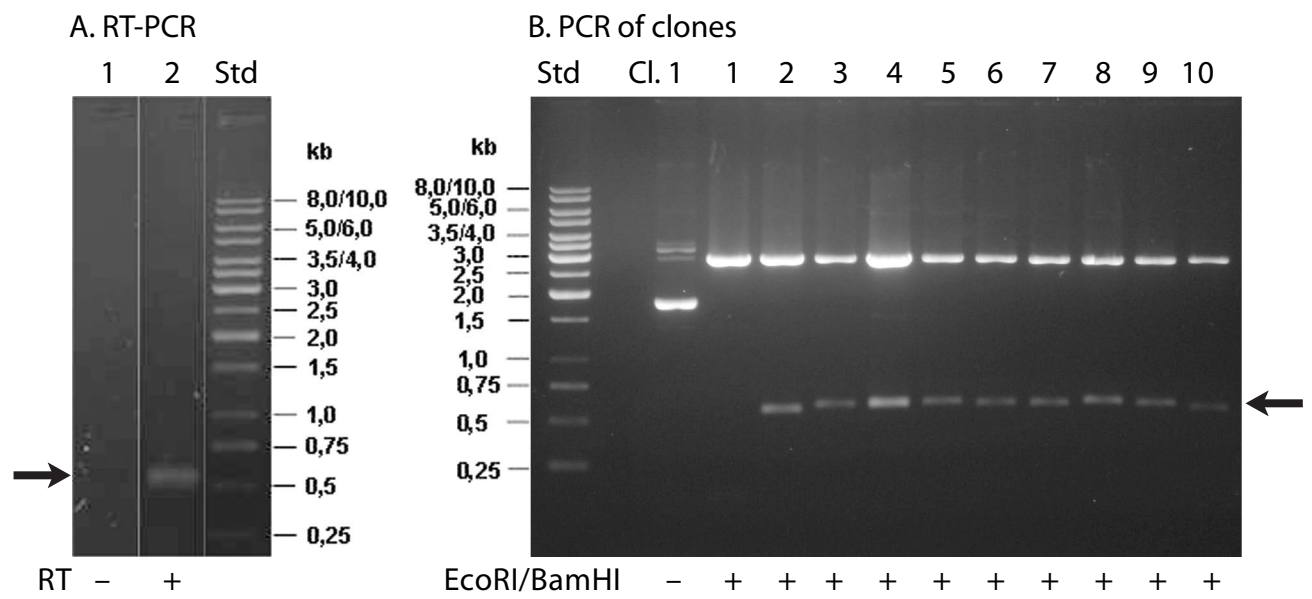

Suppl. Figure 5

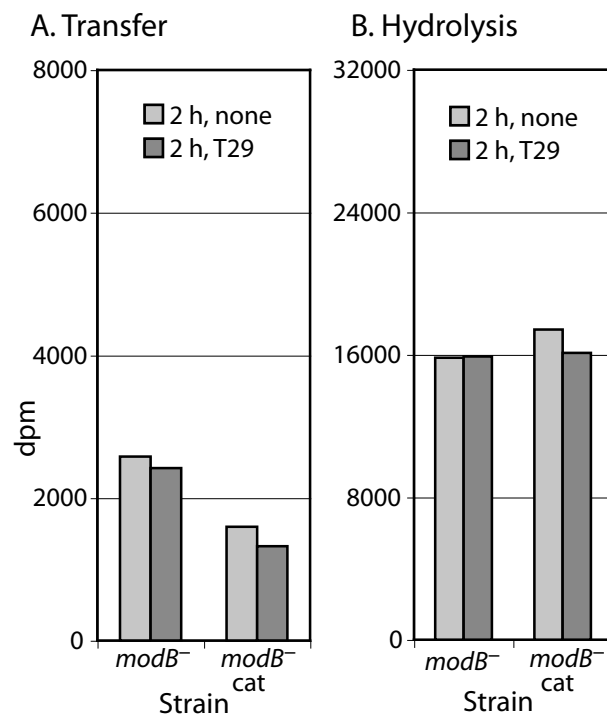



## Suppl. Figure 6

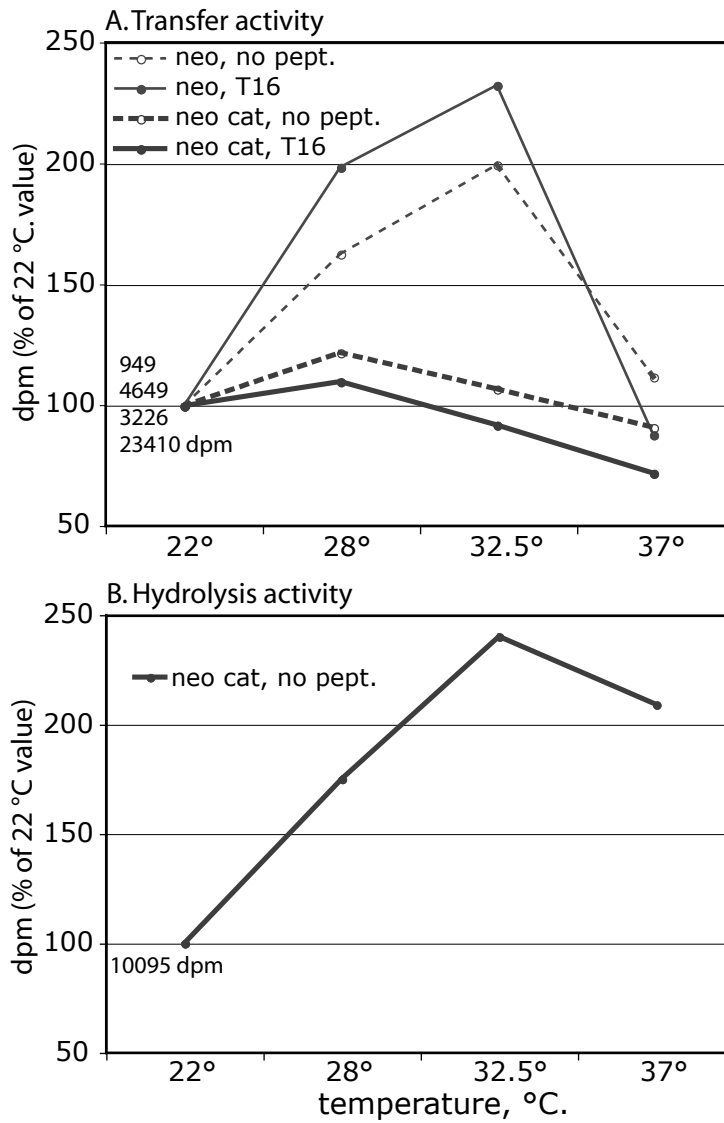

Supplement: cwp068_1.pdf [file cwp068_1.pdf]
